# Supplementary material
Source: PubMed Central journal article supplement (PMC3237048)
Supplement: NIHMS342086-supplement-supplement_1.pdf [file NIHMS342086-supplement-supplement_1.pdf]

**Supplementary Table 1.** Association between *CRP* and *IL6* SNPs and Alzheimer's disease based on 2370 controls and 1265 AD cases

| <i>Gene/Marker</i> | <i>Genotype</i> | <i>Controls, N (%)</i> | <i>AD cases, N (%)</i> | <i>OR</i> | <i>95%CI</i> |        | <i>P<sub>trend</sub></i> |
|--------------------|-----------------|------------------------|------------------------|-----------|--------------|--------|--------------------------|
| CRP/ rs2794520     | GG              | 999 (42.2)             | 534 (42.5)             | 1         | ref          |        | 0.80                     |
|                    | AG              | 1088 (46.0)            | 573 (45.6)             | 1.02      | 0.88         | – 1.18 |                          |
|                    | AA              | 279 (11.8)             | 150 (11.9)             | 1.02      | 0.82         | – 1.28 |                          |
| CRP/rs1205         | GG              | 1005 (42.6)            | 536 (42.6)             | 1         | ref          |        | 0.62                     |
|                    | AG              | 1090 (46.2)            | 573 (45.6)             | 1.02      | 0.88         | – 1.17 |                          |
|                    | AA              | 263 (11.2)             | 148 (11.8)             | 1.06      | 0.85         | – 1.33 |                          |
| CRP/rs1800947      | GG              | 2019 (85.2)            | 1043 (82.7)            | 1         | ref          |        | 0.22                     |
|                    | GC              | 333 (14.1)             | 203 (16.1)             | 1.09      | 0.90         | – 1.31 |                          |
|                    | CC              | 17 (0.7)               | 15 (1.2)               | 1.57      | 0.79         | – 3.74 |                          |
| CRP/rs1417938      | AA              | 1097 (46.3)            | 620 (49.3)             | 1         | ref          |        | 0.04                     |
|                    | AT              | 1063 (44.9)            | 541 (43.0)             | 0.90      | 0.79         | – 1.04 |                          |
|                    | TT              | 209 (8.8)              | 97 (7.7)               | 0.80      | 0.62         | – 1.03 |                          |
| CRP/rs3116650      | AA              | 1146 (48.4)            | 595 (47.5)             | 1         | ref          |        | 0.51                     |
|                    | AG              | 1030 (43.5)            | 547 (43.7)             | 1.03      | 0.90         | – 1.18 |                          |
|                    | GG              | 191 (8.1)              | 111 (8.9)              | 1.09      | 0.86         | – 1.38 |                          |
| CRP/rs11265260     | AA              | 2151 (90.9)            | 1135 (89.9)            | 1         | ref          |        | 0.33                     |
|                    | AG              | 211 (8.9)              | 122 (9.7)              | 1.09      | 0.86         | – 1.39 |                          |
|                    | GG              | 5 (0.2)                | 5 (0.4)                | 1.87      | 0.53         | – 6.64 |                          |
| rs11766273         | GG              | 1964 (0.83)            | 1041 (0.82)            | 1         | ref          |        | 0.38                     |
|                    | GA              | 390 (0.16)             | 213 (0.17)             | 1.06      | 0.88         | – 1.27 |                          |
|                    | AA              | 15 (0.006)             | 9 (0.007)              | 1.49      | 0.53         | – 4.25 |                          |
| rs10242595         | GG              | 1308 (0.55)            | 678 (0.54)             | 1         | ref          |        | 0.47                     |
|                    | GA              | 910 (0.38)             | 498 (0.39)             | 1.07      | 0.93         | – 1.22 |                          |
|                    | AA              | 151 (0.06)             | 85 (0.07)              | 1.03      | 0.78         | – 1.37 |                          |
| rs2069861          | GG              | 1954 (0.84)            | 1076 (0.87)            | 1         | ref          |        | 0.04                     |
|                    | GA              | 367 (0.16)             | 141 (0.11)             | 0.74      | 0.60         | – 0.90 |                          |
|                    | AA              | 15 (0.006)             | 13 (0.01)              | 1.50      | 0.76         | – 2.99 |                          |
| rs1554606          | AA              | 617 (0.26)             | 337 (0.27)             | 1         | ref          |        | 0.30                     |
|                    | AC              | 1179 (0.50)            | 607 (0.48)             | 1.00      | 0.85         | – 1.18 |                          |
|                    | CC              | 570 (0.24)             | 317 (0.25)             | 1.11      | 0.91         | – 1.35 |                          |
| rs2069840          | CC              | 1157 (0.49)            | 594 (0.48)             | 1         | ref          |        | 0.52                     |
|                    | CG              | 973 (0.41)             | 519 (0.42)             | 1.01      | 0.87         | – 1.16 |                          |
|                    | GG              | 233 (0.10)             | 130 (0.10)             | 1.10      | 0.87         | – 1.39 |                          |
| rs1474347          | AA              | 654 (0.28)             | 379 (0.30)             | 1         | ref          |        | 0.32                     |
|                    | AC              | 1159 (0.49)            | 590 (0.47)             | 0.90      | 0.77         | – 1.06 |                          |
|                    | CC              | 555 (0.23)             | 281 (0.22)             | 0.91      | 0.75         | – 1.11 |                          |
| rs1800796          | GG              | 2157 (0.91)            | 1162 (0.93)            | 1         | ref          |        | 0.20                     |
|                    | CG              | 196 (0.08)             | 90 (0.07)              | 0.84      | 0.66         | – 1.09 |                          |
|                    | CC              | 10 (0.004)             | 3 (0.002)              | 0.82      | 0.15         | – 4.61 |                          |
| rs2069827          | CC              | 1856 (0.78)            | 968 (0.77)             | 1         | ref          |        | 0.38                     |
|                    | AC              | 474 (0.20)             | 277 (0.22)             | 1.10      | 0.93         | – 1.30 |                          |
|                    | AA              | 37 (0.02)              | 15 (0.01)              | 0.95      | 0.50         | – 1.81 |                          |
| rs12700386         | CC              | 1641 (0.69)            | 834 (0.67)             | 1         | ref          |        | 0.08                     |
|                    | CG              | 661 (0.28)             | 374 (0.30)             | 1.09      | 0.94         | – 1.27 |                          |
|                    | GG              | 65 (0.03)              | 46 (0.04)              | 1.39      | 0.96         | – 2.01 |                          |
| rs2056576          | GG              | 1280 (0.54)            | 643 (0.52)             | 1         | ref          |        | 0.07                     |
|                    | GA              | 913 (0.39)             | 490 (0.39)             | 1.09      | 0.94         | – 1.25 |                          |
|                    | AA              | 173 (0.07)             | 113 (0.09)             | 1.25      | 0.97         | – 1.61 |                          |
| rs10499563         | AA              | 1498 (0.64)            | 774 (0.62)             | 1         | ref          |        | 1.18                     |
|                    | AG              | 761 (0.32)             | 410 (0.33)             | 1.02      | 0.88         | – 1.18 |                          |

|           |    |             |             |      |      |     |      |      |
|-----------|----|-------------|-------------|------|------|-----|------|------|
| rs1880241 | GG | 98 (0.04)   | 55 (0.04)   | 1.01 | 0.71 | –   | 1.42 | 0.86 |
|           | AG | 1151 (0.49) | 588 (0.48)  | 1    |      | ref |      |      |
|           | AA | 722 (0.31)  | 372 (0.30)  | 1.00 | 0.86 | –   | 1.17 |      |
| rs7801617 | GG | 469 (0.20)  | 274 (0.22)  | 1.12 | 0.92 | –   | 1.37 | 0.29 |
|           | GG | 1951 (0.82) | 1039 (0.82) | 1    |      | ref |      |      |
|           | GA | 400 (0.17)  | 217 (0.17)  | 1.00 | 0.84 | –   | 1.20 |      |
| rs1546762 | AA | 19 (0.008)  | 9 (0.007)   | 0.88 | 0.44 | –   | 1.77 | 0.93 |
|           | GG | 689 (0.29)  | 343 (0.27)  | 1    |      | ref |      |      |
|           | AG | 1161 (0.49) | 594 (0.47)  | 1.02 | 0.88 | –   | 1.20 |      |
|           | AA | 518 (0.22)  | 319 (0.25)  | 1.17 | 0.97 | –   | 1.43 | 0.12 |

Odds Ratios (OR) with 95% Confidence Intervals (CI) from Alternating Logistic Regression with the most common homozygote genotype as the reference level. Adjusted for age and sex.

**Supplementary Table 2.** Haplotypes in CRP and IL6 and their association with AD

| Haplotypes in CRP |        |           |           |           |            |              |                     |                               |  |
|-------------------|--------|-----------|-----------|-----------|------------|--------------|---------------------|-------------------------------|--|
|                   | rs1205 | rs1800947 | rs1417938 | rs3116650 | rs11265260 | Frequency, % | Association with AD |                               |  |
|                   |        |           |           |           |            |              | Uncorrected p-value | Corrected p-value (1000 perm) |  |
| C1                | G      | G         | T         | A         | A          | 30.6         | 0.11                | 0.34                          |  |
| C2                | G      | G         | A         | G         | A          | 29.9         | 0.33                | 0.77                          |  |
| C3                | A      | G         | A         | A         | A          | 26.2         | 0.23                | 0.64                          |  |
| C4                | A      | C         | A         | A         | A          | 8.3          | 0.03                | 0.10                          |  |

  

| Haplotypes in IL6 |            |           |           |            |           |           |           |              |                     |                               |      |
|-------------------|------------|-----------|-----------|------------|-----------|-----------|-----------|--------------|---------------------|-------------------------------|------|
|                   | LD block 1 |           |           | LD block 2 |           |           |           | Frequency, % | Association with AD |                               |      |
|                   | rs1546762  | rs7801617 | rs1800796 | rs1800795  | rs2069837 | rs1474347 | rs2069840 | rs1554606    | Uncorrected p-value | Corrected p-value (1000 perm) |      |
| I1                | G          | G         |           |            |           |           |           |              | 52.7                | 0.12                          | 0.50 |
| I2                | A          | G         |           |            |           |           |           |              | 30.8                | 0.46                          | 0.95 |
| I3                | A          | A         |           |            |           |           |           |              | 9.3                 | 14.1                          | 0.55 |
| I4                |            |           | G         | C          | A         | C         | C         | A            | 47.1                | 59.3                          | 0.99 |
| I5                |            |           | G         | G          | A         | A         | G         | C            | 30.8                | 54.4                          | 0.98 |
| I6                |            |           | G         | G          | G         | A         | C         | C            | 8.0                 | 15.1                          | 0.57 |
| I7                |            |           | G         | G          | A         | A         | C         | C            | 6.2                 | 15.2                          | 0.57 |

Block structure defined by Confidence Intervals (Gabriel et al, Science, 2002) in HapMap CEU down load data between 15640 & 15660 kb (Chr 1) for CRP and 22530 & 22550 kb (Chr7) for IL6. The association modeled (p-value) is the case-control association between control group and AD cases. Only haplotypes with frequency >5% were included. The corrected p-value is based on 1000 permutations, i.e. the test statistic is also influenced by “chance” and can vary from each time the permutation is done.
